# Supplementary material
Source: PubMed Central journal article supplement (PMC5328484)
Supplement: IAI.00903-16_zii999091981s1.pdf [file IAI.00903-16_zii999091981s1.pdf]

**Supplemental Video S1:** RAW macrophages were co-cultured for 18 hours with purified spores of *E. rostratum* and imaged using time-lapse microscopy. Images demonstrate that RAW macrophages are unable to phagocytose *E. rostratum* spores and hyphae. Additionally, *E. rostratum* is able to germinate and produce hyphae despite presence of macrophages.
